# Supplementary material
Source: Springer Nature journal article supplement (https://www.springermedizin.de/resource/supplementary/12889_2010_2779_MOESM2_ESM.pdf/9488930)

Variation of Physical Functioning

50  
0  
-50  
-100  
-150

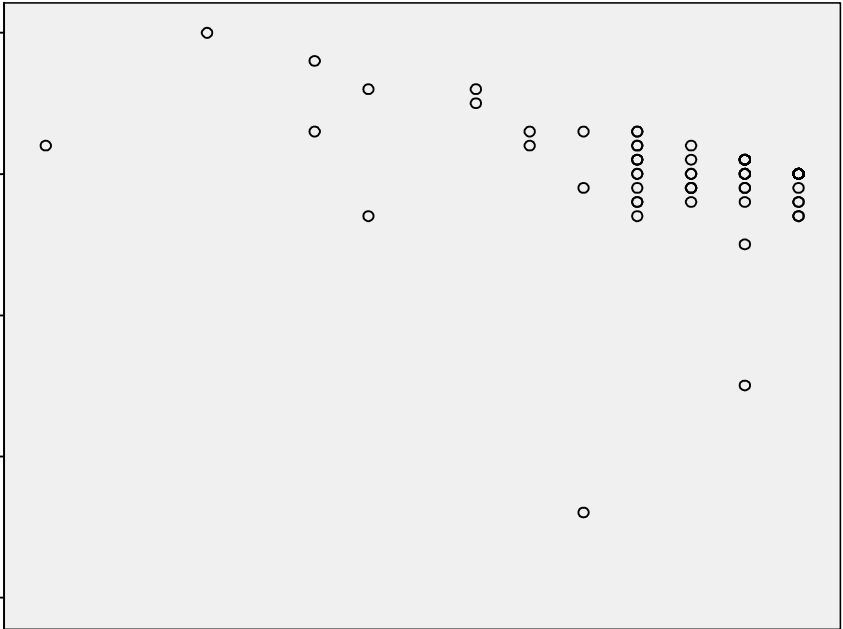

Baseline Physical Functioning

Supplement: MOESM2 [file 9488930]
